# Supplementary material for: Pumpless microfluidic devices for generating healthy and diseased endothelia
Source: Royal Society of Chemistry journal article supplement (doi:10.1039/c9lc00446g), 2019-01-01
Supplement: c9lc00446g1.pdf [file c9lc00446g1.pdf]

Supplementary Information for

## Pumpless Microfluidic Devices for Generating Healthy and Diseased Endothelia

Yang Yang,<sup>a,b</sup> Parinaz Fathi,<sup>c</sup> Glenn Holland,<sup>a</sup> Dipanjan Pan,<sup>c</sup> Nam Sun Wang,<sup>b</sup> and Mandy B. Esch<sup>a,†</sup>

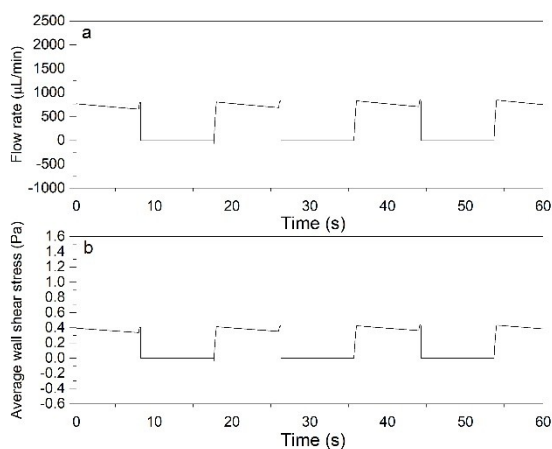

Figure S1. Fluidic flow pattern that results when the rotating platform is tilted at a 90° angle and rotates 180° every 4 seconds.

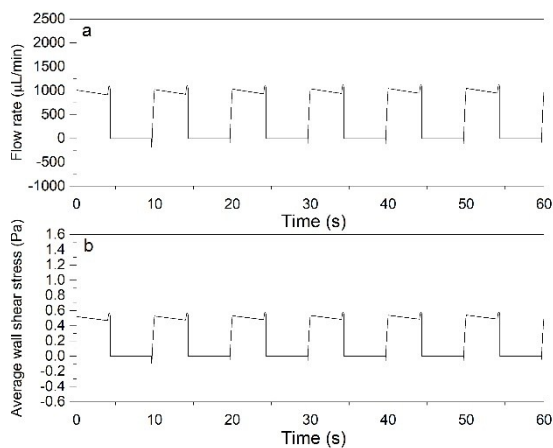

Figure S2. Fluidic flow pattern that results when the rotating platform is tilted at a 45° angle and rotates 180° every 8 seconds.

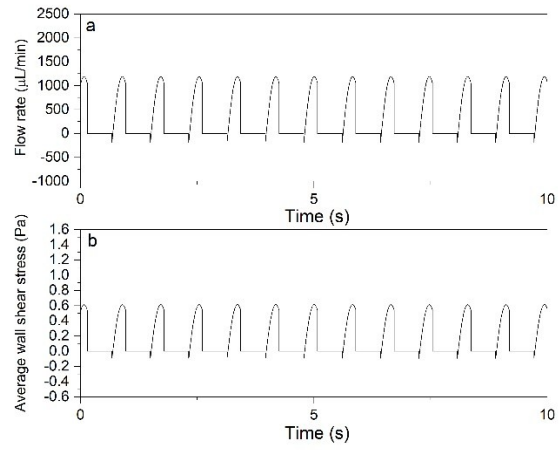

Figure S3. Fluidic flow pattern that results when the rotating platform is tilted at a 90° angle and rotates with a frequency of 73 Hz.
